# Supplementary material for: Protection of Vitamin C on Oxidative Damage Caused by Long-Term Excess Iodine Exposure in Wistar Rats
Source: MDPI journal article supplement (doi:10.3390/nu14245245), 2022-12-09
Supplement: s1 [file s1]

Table S1. Water consumption and iodine consumption

| Month  | Classification | Male<br>mL/w<br>( $\bar{\chi} \pm S$ ) |                              | Female<br>mL/w<br>( $\bar{\chi} \pm S$ ) |                              |
|--------|----------------|----------------------------------------|------------------------------|------------------------------------------|------------------------------|
|        |                | KI ( $n = 4$ )                         | KIO <sub>3</sub> ( $n = 4$ ) | KI ( $n = 8$ )                           | KIO <sub>3</sub> ( $n = 8$ ) |
| First  | NI             | 3008.25±134.29                         | 2667.70±145.67               | 1914.22±143.31                           | 1987.49±113.38               |
|        | HI             | 2767.19±163.02                         | 3054.76±119.91               | 1846.28±166.81                           | 1856.90±311.35               |
|        | HI+LC          | 2736.65±255.98                         | 2427.71±165.58               | 1795.57±221.60                           | 1499.38±157.29               |
|        | HI+HC          | 2819.26±465.82                         | 2820.73±205.66               | 1801.99±284.11                           | 2106.65±355.33               |
|        | <i>P</i>       | 0.556                                  | 0.001**<br>HI+LC<NI,HI+HC<HI | 0.661                                    | 0.000**<br>HI+LC<HI,NI,HI+HC |
| Second | NI             | 2845.65±431.32                         | 2864.85±629.72               | 1991.96±407.85                           | 2031.28±202.30               |
|        | HI             | 2643.35±402.41                         | 3003.13±583.71               | 1942.16±253.38                           | 1861.61±395.72               |
|        | HI+LC          | 2784.55±535.82                         | 2877.60±475.12               | 1816.90±232.91                           | 1515.90±312.49               |
|        | HI+HC          | 2786.03±529.20                         | 2575.80±435.69               | 1905.54±213.22                           | 2153.34±300.09               |
|        | <i>P</i>       | 0.647                                  | 0.936                        | 0.666                                    | 0.212                        |
| Third  | NI             | 3350.25±449.06                         | 3188.78±558.50               | 1951.15±412.59                           | 2642.90±448.19               |
|        | HI             | 2956.20±569.24                         | 3568.95±494.79               | 1891.65±530.69                           | 2246.50±560.97               |
|        | HI+LC          | 3569.85±448.59                         | 2902.73±587.47               | 2125.28±609.81                           | 1536.70±100.89               |
|        | HI+HC          | 3242.30±525.05                         | 3248.45±602.54               | 2057.25±320.81                           | 2696.74±361.36               |
|        | <i>P</i>       | 0.411                                  | 0.450                        | 0.322                                    | 0.059                        |
| Fourth | NI             | 3030.18±293.33                         | 2957.60±147.17               | 2194.74±150.52                           | 2261.53±166.49               |
|        | HI             | 2576.88±132.71                         | 3412.95±333.58               | 2064.14±241.26                           | 2109.28±381.42               |
|        | HI+LC          | 3318.43±336.20                         | 2521.43±52.80                | 1858.68±214.39                           | 1660.78±419.33               |
|        | HI+HC          | 2958.73±35.37                          | 2968.08±76.40                | 2127.14±90.50                            | 2387.04±67.29                |
|        | <i>P</i>       | 0.006**<br>HI<NI,HI+LC,HI+HC           | 0.000**<br>HI+LC<NI,HI+HC<HI | 0.007**<br>HI+LC<NI,HI,HI+HC             | 0.001**<br>HI+LC<HI,NI,HI+HC |

Note: \*\* represented that P value was lower than 0.01.

Table S2. Food consumption and iodine intake

| Month                                             | Classification | Male                              |                              | Female                            |                              |
|---------------------------------------------------|----------------|-----------------------------------|------------------------------|-----------------------------------|------------------------------|
|                                                   |                | $\frac{g}{w}$<br>( $\chi \pm S$ ) |                              | $\frac{g}{w}$<br>( $\chi \pm S$ ) |                              |
|                                                   |                | KI ( $n = 4$ )                    | KIO <sub>3</sub> ( $n = 4$ ) | KI ( $n = 8$ )                    | KIO <sub>3</sub> ( $n = 8$ ) |
| First                                             | NI             | 902.82±16.33                      | 896.83±9.33                  | 689.69±26.55                      | 696.12±30.76                 |
|                                                   | HI             | 911.60±20.18                      | 917.27±29.08                 | 702.42±45.61                      | 662.68±58.32                 |
|                                                   | HI+LC          | 862.47±24.14                      | 873.92±26.05                 | 652.45±38.79                      | 663.47±30.06                 |
|                                                   | HI+HC          | 884.91±6.34                       | 898.51±44.79                 | 650.07±21.39                      | 710.74±16.47                 |
|                                                   | <i>P</i>       | 0.183                             | 0.292                        | 0.002**                           | 0.039*                       |
| Second                                            | NI             | 929.82±41.59                      | 893.25±30.30                 | 671.05±37.19                      | 718.17±25.75                 |
|                                                   | HI             | 855.82±36.17                      | 927.24±10.83                 | 680.74±32.65                      | 647.51±24.94                 |
|                                                   | HI+LC          | 858.01±43.19                      | 863.34±29.18                 | 646.15±24.04                      | 647.86±18.44                 |
|                                                   | HI+HC          | 838.96±14.31                      | 881.39±31.25                 | 621.62±22.19                      | 702.44±30.85                 |
|                                                   | <i>P</i>       | 0.017*                            | 0.025*                       | 0.000**                           | 0.000**                      |
| Third                                             | NI             | 891.83±21.85                      | 830.95±9.73                  | 631.53±28.26                      | 644.11±45.87                 |
|                                                   | HI             | 795.83±22.90                      | 824.80±7.40                  | 625.69±36.54                      | 610.10±32.06                 |
|                                                   | HI+LC          | 818.85±32.47                      | 793.98±20.21                 | 566.89±20.10                      | 599.10±14.35                 |
|                                                   | HI+HC          | 859.35±10.98                      | 837.08±57.04                 | 630.84±22.52                      | 675.71±30.04                 |
|                                                   | <i>P</i>       | 0.000**                           | 0.255                        | 0.002**                           | 0.002**                      |
| Fourth                                            | NI             | 910.53±33.06                      | 870.45±24.32                 | 670.56±31.84                      | 675.40±37.78                 |
|                                                   | HI             | 842.05±21.12                      | 887.45±16.78                 | 659.53±42.48                      | 632.40±34.60                 |
|                                                   | HI+LC          | 874.68±27.56                      | 835.60±6.55                  | 633.29±29.13                      | 638.70±20.99                 |
|                                                   | HI+HC          | 881.10±26.79                      | 894.30±9.49                  | 681.29±16.54                      | 733.78±26.31                 |
|                                                   | <i>P</i>       | 0.030*                            | 0.001**                      | 0.030*                            | 0.000**                      |
| Iodine intake <sup>a</sup><br>( $\mu\text{g/d}$ ) | NI             | 17.35                             | 16.64                        | 12.39                             | 12.95                        |
|                                                   | HI             | 3920.66                           | 4669.71                      | 2775.53                           | 2892.62                      |
|                                                   | HI+LC          | 4444.20                           | 3844.03                      | 2721.93                           | 2453.11                      |
|                                                   | HI+HC          | 4228.88                           | 4190.04                      | 2827.73                           | 3347.08                      |

Note: \*\* represented that P value was lower than 0.01, and \* represented that  $P < 0.05$ .

<sup>a</sup> represented the iodine intake of each day, which was calculated through water and food consumption and iodine amount of them (food, 500 $\mu\text{g/kg}$ ), and because of the data size, the data variation was not displayed.

**Table S3.** Protection of vitamin C from oxidative damage in serum.

| Indicators                  | Classification | KI<br>( $\bar{\chi} \pm S$ )<br>( <i>n</i> = 15) | KIO <sub>3</sub><br>( $\bar{\chi} \pm S$ )<br>( <i>n</i> = 15) | <i>P</i> |
|-----------------------------|----------------|--------------------------------------------------|----------------------------------------------------------------|----------|
|                             |                |                                                  |                                                                |          |
| TAOC <sup>a</sup><br>U/mL   | NI             | 4.03±1.21                                        | 3.85±1.00                                                      | 0.671    |
|                             | HI             | 3.95±1.04                                        | 4.12±1.55                                                      | 0.741    |
|                             | HI+LC          | 4.59±1.53                                        | 3.77±1.22                                                      | 0.117    |
|                             | HI+HC          | 4.68±1.18                                        | 4.14±1.00                                                      | 0.199    |
|                             | <i>P</i>       | 0.416                                            | 0.842                                                          |          |
| CAT <sup>b</sup><br>U/mL    | NI             | 3.39±1.24                                        | 4.06±1.49                                                      | 0.178    |
|                             | HI             | 3.62±1.48                                        | 3.85±2.21                                                      | 0.967    |
|                             | HI+LC          | 3.86±1.67                                        | 4.27±1.87                                                      | 0.567    |
|                             | HI+HC          | 3.09±1.45                                        | 3.23±1.17                                                      | 0.591    |
|                             | <i>P</i>       | 0.490                                            | 0.387                                                          |          |
| SOD <sup>c</sup><br>U/mL    | NI             | 267.36±17.43                                     | 259.36±42.55                                                   | 0.769    |
|                             | HI             | 268.23±36.70                                     | 235.32±47.64                                                   | 0.005**  |
|                             | HI+LC          | 257.63±43.83                                     | 258.49±44.41                                                   | 0.806    |
|                             | HI+HC          | 260.93±44.12                                     | 254.76±43.62                                                   | 0.747    |
|                             | <i>P</i>       | 0.622                                            | 0.192                                                          |          |
| MDA <sup>d</sup><br>nmol/mL | NI             | 4.13±0.77                                        | 4.77±1.03                                                      | 0.085    |
|                             | HI             | 4.69±1.52                                        | 5.01±1.47                                                      | 0.512    |
|                             | HI+LC          | 4.82±1.35                                        | 4.72±1.55                                                      | 0.775    |
|                             | HI+HC          | 4.39±1.54                                        | 4.64±1.48                                                      | 0.477    |
|                             | <i>P</i>       | 0.341                                            | 0.831                                                          |          |
| GSH-Px <sup>e</sup><br>U/mL | NI             | 1892.82±290.90                                   | 1925.41±380.45                                                 | 0.946    |
|                             | HI             | 1849.76±302.39                                   | 1890.22±454.37                                                 | 0.512    |
|                             | HI+LC          | 1854.59±297.15                                   | 1890.92±369.58                                                 | 0.935    |
|                             | HI+HC          | 1916.51±356.05                                   | 1780.27±202.89                                                 | 0.451    |
|                             | <i>P</i>       | 0.964                                            | 0.635                                                          |          |

Note: \*\* represented that P value was lower than 0.01.

<sup>a</sup> TAOC, total antioxidant capacity;

<sup>b</sup> CAT, Catalase;

<sup>c</sup> SOD, superoxide dismutase;

<sup>d</sup> MDA, malondialdehyde;

<sup>e</sup> GSH-Px, glutathione peroxidase;

**Table S4.** Protection of vitamin C from oxidative damage in brain.

| Indicators         | Classification | KI<br>( $\bar{\chi} \pm S$ )<br>( <i>n</i> = 15) | KIO <sub>3</sub><br>( $\bar{\chi} \pm S$ )<br>( <i>n</i> = 15) | <i>P</i> |
|--------------------|----------------|--------------------------------------------------|----------------------------------------------------------------|----------|
| TAOC<br>U/mgprot   | NI             | 0.22±0.11                                        | 0.26±0.10                                                      | 0.285    |
|                    | HI             | 0.21±0.10                                        | 0.21±0.06                                                      | 0.567    |
|                    | HI+LC          | 0.18±0.06                                        | 0.18±0.06                                                      | 0.806    |
|                    | HI+HC          | 0.18±0.09                                        | 0.20±0.11                                                      | 0.870    |
|                    | <i>P</i>       | 0.443                                            | 0.060                                                          |          |
| CAT<br>U/mgprot    | NI             | 0.23±0.05                                        | 0.24±0.12                                                      | 0.870    |
|                    | HI             | 0.25±0.12                                        | 0.26±0.07                                                      | 0.325    |
|                    | HI+LC          | 0.25±0.10                                        | 0.23±0.10                                                      | 0.512    |
|                    | HI+HC          | 0.22±0.10                                        | 0.21±0.06                                                      | 0.653    |
|                    | <i>P</i>       | 0.732                                            | 0.391                                                          |          |
| SOD<br>U/mgprot    | NI             | 74.45±11.97                                      | 80.75±13.68                                                    | 0.325    |
|                    | HI             | 70.87±10.30                                      | 76.85±18.52                                                    | 0.512    |
|                    | HI+LC          | 73.37±12.87                                      | 74.31±7.03                                                     | 0.838    |
|                    | HI+HC          | 74.51±13.92                                      | 73.76±10.54                                                    | 0.806    |
|                    | <i>P</i>       | 0.826                                            | 0.439                                                          |          |
| MDA<br>nmol/mgprot | NI             | 5.86±1.04                                        | 5.23±0.81                                                      | 0.089    |
|                    | HI             | 5.20±0.78                                        | 5.58±1.29                                                      | 0.838    |
|                    | HI+LC          | 5.31±1.00                                        | 5.39±1.19                                                      | 0.935    |
|                    | HI+HC          | 4.92±0.89                                        | 4.94±1.19                                                      | 0.838    |
|                    | <i>P</i>       | 0.101                                            | 0.635                                                          |          |
| GSH-Px<br>U/mgprot | NI             | 11.25±2.42                                       | 12.12±2.33                                                     | 0.322    |
|                    | HI             | 10.24±1.79                                       | 11.32±2.12                                                     | 0.143    |
|                    | HI+LC          | 10.52±1.44                                       | 10.84±2.60                                                     | 0.682    |
|                    | HI+HC          | 10.47±2.29                                       | 10.81±2.19                                                     | 0.685    |
|                    | <i>P</i>       | 0.527                                            | 0.413                                                          |          |

**Table S5.** Protection of vitamin C from oxidative damage in lens.

| Indicators         | Classification | KI<br>( $\bar{\chi} \pm S$ )<br>( <i>n</i> = 15) | KIO <sub>3</sub><br>( $\bar{\chi} \pm S$ )<br>( <i>n</i> = 15) | <i>P</i> |
|--------------------|----------------|--------------------------------------------------|----------------------------------------------------------------|----------|
| TAOC<br>U/mgprot   | NI             | 0.06±0.02                                        | 0.06±0.02                                                      | 0.486    |
|                    | HI             | 0.06±0.03                                        | 0.06±0.02                                                      | 0.202    |
|                    | HI+LC          | 0.06±0.03                                        | 0.05±0.02                                                      | 0.267    |
|                    | HI+HC          | 0.06±0.02                                        | 0.06±0.02                                                      | 0.683    |
|                    | <i>P</i>       | 0.602                                            | 0.055                                                          |          |
| SOD<br>U/mgprot    | NI             | 1.55±0.78                                        | 1.66±0.55                                                      | 0.567    |
|                    | HI             | 1.73±0.80                                        | 1.88±0.90                                                      | 0.683    |
|                    | HI+LC          | 1.48±0.74                                        | 1.54±0.63                                                      | 0.713    |
|                    | HI+HC          | 1.53±0.61                                        | 1.61±0.55                                                      | 0.744    |
|                    | <i>P</i>       | 0.856                                            | 0.795                                                          |          |
| MDA<br>nmol/mgprot | NI             | 1.52±1.38                                        | 0.94±0.68                                                      | 0.106    |
|                    | HI             | 1.85±1.79                                        | 1.22±1.04                                                      | 0.624    |
|                    | HI+LC          | 1.65±0.98                                        | 1.55±1.24                                                      | 0.250    |
|                    | HI+HC          | 1.81±1.61                                        | 0.98±0.72                                                      | 0.050    |
|                    | <i>P</i>       | 0.626                                            | 0.242                                                          |          |
| GSH-Px<br>U/mgprot | NI             | 5.39±2.26                                        | 5.30±0.98                                                      | 0.653    |
|                    | HI             | 5.18±2.08                                        | 5.80±2.83                                                      | 0.624    |
|                    | HI+LC          | 4.97±2.46                                        | 4.88±1.43                                                      | 0.624    |
|                    | HI+HC          | 5.12±1.89                                        | 4.84±1.34                                                      | 0.775    |
|                    | <i>P</i>       | 0.851                                            | 0.486                                                          |          |
